# Supplementary material
Source: Elsevier journal article supplement (https://penta-id.org/wp-content/uploads/2017/04/mmc1.pdf)
Supplement: mmc1 [file mmc1.pdf]

# THE LANCET Infectious Diseases

## Supplementary webappendix

This webappendix formed part of the original submission and has been peer reviewed.  
We post it as supplied by the authors.

Supplement to: Baud D, Van Mieghem T, Musso D, Truttmann AC, Panchaud A, Vouga M. Clinical management of pregnant women exposed to Zika virus. *Lancet Infect Dis* 2016; published online April 4. [http://dx.doi.org/10.1016/S1473-3099\(16\)30008-1](http://dx.doi.org/10.1016/S1473-3099(16)30008-1).

**POSTNATAL PRENATAL**

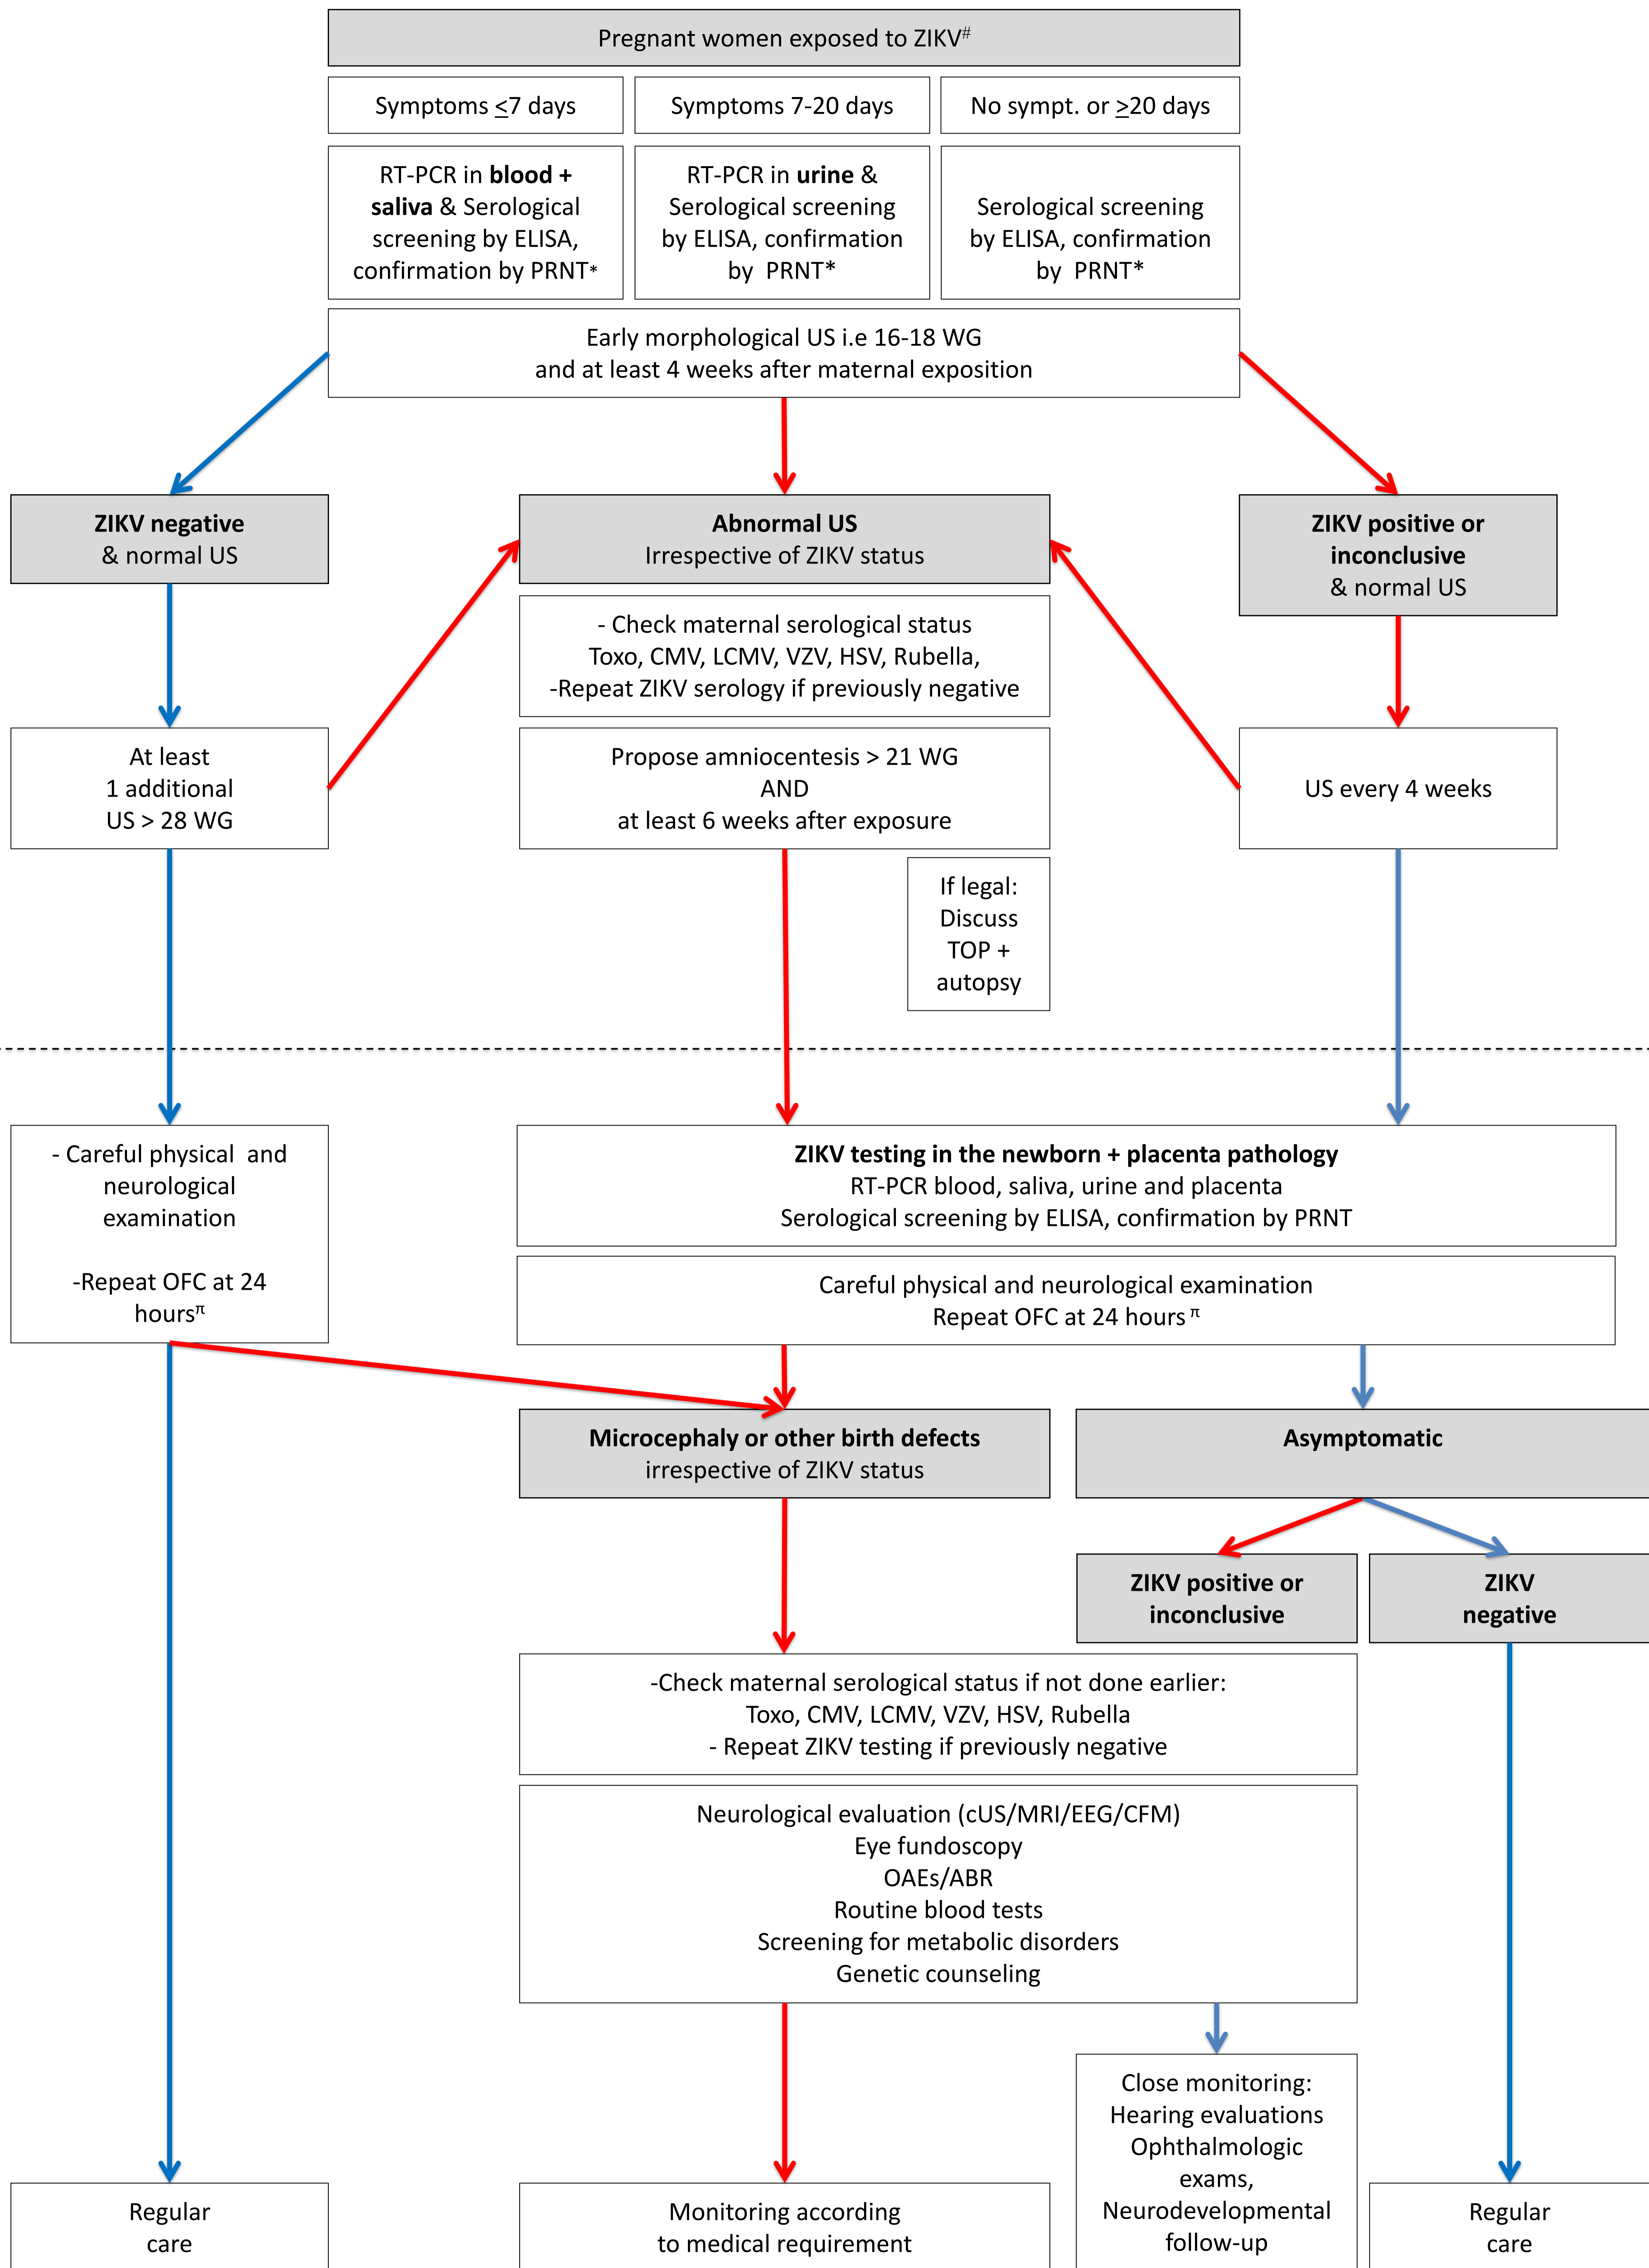

86 **FIGURE 1**

87 # Pregnant women living in ZIKV endemic area or who travelled in area where ZIKV was  
88 circulating and which presented or not symptoms of ZIKV infection

89 \* Serological screening by ELISA, confirmation by PRNT to be repeated two times

90 <sup>π</sup> Repeat Occipito-frontal circumference at 24 hours use WHO<sup>1</sup>/ InterGrowth<sup>2</sup> charts adjusted  
91 for gestational age

92

93 Red arrows = abnormal results or investigations

94 Blue arrows = normal results or investigations

95 Routine blood tests: at least CBC, hepatic and renal function.

96 Uniform screening usually performed at 4 days of life in every newborn.

97 To exclude other congenital infections, at least a CMV specific PCR in a urine sample should  
98 be performed; additional testing may be dependent on maternal status and history.

99

100 **Abbreviations:**

101 ABR, Auditory Brainstem Response;

102 CBC, Complete Blood Count;

103 GA, Gestational Age

104 LCMV, Lymphocytic Choriomeningitis Virus

105 Toxo, Toxoplasma gondii;

106 CMV, cytomegalovirus;

107 VZV, Varicella Zoster virus;

108 HSV, Herpes simplex virus

109 OAEs, Otoacoustic emissions;

110 OFC, Occipito-frontal circumference

111 PRNT, Plaque Reduction Neutralization Test;  
112 US, Ultrasound;  
113 cUS, cerebral ultrasound;  
114 WG, Weeks Gestation;  
115 TOP, Termination of pregnancy  
116 ZIKV, Zika virus  
117 EEG, electroencephalogram.  
118 CFM, cerebral function monitoring (at least, if EEG is not available)

119

120 **References for figure:**

121 1) Borghi E, de Onis M, Garza C, Van den Broeck J, Frongillo EA, Grummer-Strawn L, Van  
122 Buuren S, Pan H, Molinari L, Martorell R, Onyango AW, Martines JC, Group WHOMGRS.  
123 2006. Construction of the World Health Organization child growth standards: selection of  
124 methods for attained growth curves. *Stat Med* 25:247-265.

125

126 2) Villar J, Cheikh Ismail L, Victora CG, Ohuma EO, Bertino E, Altman DG, Lambert A,  
127 Papageorghiou AT, Carvalho M, Jaffer YA, Gravett MG, Purwar M, Frederick IO, Noble AJ,  
128 Pang R, Barros FC, Chumlea C, Bhutta ZA, Kennedy SH, International F, Newborn Growth  
129 Consortium for the 21st C. 2014. International standards for newborn weight, length, and  
130 head circumference by gestational age and sex: the Newborn Cross-Sectional Study of the  
131 INTERGROWTH-21st Project. *Lancet (London, England)* 384:857-868

132
